# Supplementary material
Source: MDPI journal article supplement (https://www.mdpi.com/2306-5338/10/5/110)
Supplement: s1 [file s1]

### Supplementary material 1

This document describes the 78 additional derived spectral indices/features in addition to the nine primary bands of Landsat-8 (OLI) imagery used in the study.

**Table S1:** Water indices as features derived from Landsat 8 OLI used in the study. <https://custom-scripts.sentinel-hub.com/custom-scripts/landsat-8/indexdb/>

| <u>Description</u>                                                                           | <u>Indices</u>           | <u>formula</u>                                                                                                                                      |
|----------------------------------------------------------------------------------------------|--------------------------|-----------------------------------------------------------------------------------------------------------------------------------------------------|
| <u>Blue-wide Dynamic Range Vegetation Index</u>                                              | <u>BWDRVI</u>            | $\frac{0.1 * NIR - BLUE}{0.1 * NIR + BLUE}$                                                                                                         |
| <u>Chlorophyll Index Green</u>                                                               | <u>Clgreen</u>           | $\frac{(NIR - GREEN)}{GREEN} - 1$                                                                                                                   |
| <u>Chlorophyll Vegetation index</u>                                                          | <u>CVI</u>               | $\frac{NIR * RED}{GREEN^2}$                                                                                                                         |
| <u>Coloration index</u>                                                                      | <u>CI</u>                | $\frac{(RED - BLUE)}{RED}$                                                                                                                          |
| <u>Corrected Transformed Vegetation Index</u>                                                | <u>CTVI</u>              | $\frac{(((RED - GREEN) / (RED + GREEN + 0.5)) / Abs(((RED - GREEN) / (RED + GREEN + 0.5)))) * sqrt(abs(((RED - GREEN) / (RED + GREEN + 0.5))))}{1}$ |
| <u>Difference NIR/Green Difference</u>                                                       | <u>GDVI</u>              | $\frac{(NIR - GREEN)}{GREEN}$                                                                                                                       |
| <u>Differenced Vegetation Index MSS</u>                                                      | <u>DVIMSS</u>            | $2.4 * NIR - RED$                                                                                                                                   |
| <u>Enhanced Vegetation Index</u>                                                             | <u>EVI</u>               | $\frac{2.5 * ((NIR - RED) / ((NIR + 6 * RED - 7.5 * BLUE) + 1))}{1}$                                                                                |
| <u>Enhanced Vegetation Index 2</u>                                                           | <u>EVI2</u>              | $\frac{2.4 * ((NIR - RED) / (NIR + RED + 1))}{1}$                                                                                                   |
| <u>Enhanced Vegetation Index 2-2</u>                                                         | <u>EVI2-2</u>            | $\frac{2.5 * ((NIR - RED) / (NIR + 2.4 * RED + 1))}{1}$                                                                                             |
| <u>NIR-Green NDVI</u>                                                                        | <u>GNDVI_1</u>           | $\frac{(NIR - GREEN)}{(NIR + GREEN)}$                                                                                                               |
| <u>NIR-Red NDVI</u>                                                                          | <u>GNDVI_2</u>           | $\frac{(NIR - RED)}{(NIR + RED)}$                                                                                                                   |
| <u>NIR-SWIR1 NDVI</u>                                                                        | <u>GNDVI_3</u>           | $\frac{(NIR - SWIR1)}{(NIR + SWIR1)}$                                                                                                               |
| <u>NIR-SWIR2 NDVI</u>                                                                        | <u>GNDVI_4</u>           | $\frac{(NIR - SWIR2)}{(NIR + SWIR2)}$                                                                                                               |
| <u>Normalized Difference Water Index with NIR, SWIR1 &amp; SWIR2</u>                         | <u>GNDVI_5</u>           | $\frac{(NIR - SWIR1)}{(NIR + SWIR2)}$                                                                                                               |
| <u>Normalized Difference Water Index with SWIR2 &amp; SWIR1</u>                              | <u>GNDVI_6</u>           | $\frac{(NIR - SWIR2)}{(NIR + SWIR1)}$                                                                                                               |
| <u>Normalized Difference Water Index with SWIR1 &amp; SWIR2</u>                              | <u>NDVI</u>              | $\frac{(NIR - RED)}{(NIR + RED)}$                                                                                                                   |
| <u>Normalized Difference NIR/SWIR1 Modified Normalized Difference Vegetation Index</u>       | <u>MNDWI<sub>1</sub></u> | $\frac{(GREEN - SWIR1)}{(GREEN + SWIR1)}$                                                                                                           |
| <u>Normalized Difference NIR/SWIR2 Modified Normalized Difference Vegetation Index</u>       | <u>MNDWI<sub>2</sub></u> | $\frac{(GREEN - SWIR2)}{(GREEN + SWIR2)}$                                                                                                           |
| <u>Normalized Difference NIR/SWIR1 SWIR2 Modified Normalized Difference Vegetation Index</u> | <u>MNDWI<sub>3</sub></u> | $\frac{(GREEN - SWIR1)}{(GREEN + SWIR2)}$                                                                                                           |
| <u>Normalized Difference NIR/SWIR2 SWIR1 Modified Normalized Difference Vegetation Index</u> | <u>MNDWI<sub>4</sub></u> | $\frac{(GREEN - SWIR2)}{(GREEN + SWIR1)}$                                                                                                           |
| <u>New Water Index</u>                                                                       | <u>NWI</u>               | $\frac{(BLUE - (NIR + SWIR1 + SWIR2)) / BLUE + (NIR + SWIR1 + SWIR2)}{1}$                                                                           |
| <u>RED SWIR1 band difference</u>                                                             | <u>TWI_1</u>             | $RED - SWIR1$                                                                                                                                       |

| <u>RED SWIR2 band difference</u>                                       | <u>TWI 2</u>              | <u>RED – SWIR2</u>                                                                                                                                                                                                                                                 |
|------------------------------------------------------------------------|---------------------------|--------------------------------------------------------------------------------------------------------------------------------------------------------------------------------------------------------------------------------------------------------------------|
| <u>Algal Bloom Index</u>                                               | <u>ABI</u>                | $\frac{(RED - BLUE) * (GREEN - BLUE)}{(RED - BLUE) - NIR - BLUE} * \frac{(GREEN - BLUE)}{(NIR - BLUE)}$                                                                                                                                                            |
| <u>Floating Algae Index</u>                                            | <u>FAI</u>                | $\frac{(NIR - RED) + (RED - SWIR1) * (\lambda_{nir} - \lambda_{red})}{\lambda_{swir} - \lambda_{red}}$ <p>Where,<br/> <math>\lambda_{red} = 662 \text{ nm}</math>, <math>\lambda_{nir} = 835 \text{ nm}</math>, <math>\lambda_{swir} = 1648 \text{ nm}</math>.</p> |
| <u>Automated water extraction index with SWIR1</u>                     | <u>AWEI<sub>1</sub></u>   | $(4 * (GREEN - SWIR1) - (0.25 * NIR + 2.75 * SWIR1))$                                                                                                                                                                                                              |
| <u>Automated water extraction index with SWIR1</u>                     | <u>AWEI<sub>2</sub></u>   | $(4 * (GREEN - SWIR2) - (0.25 * NIR + 2.75 * SWIR2))$                                                                                                                                                                                                              |
| <u>Automated water extraction index with SWIR2 &amp; SWIR1</u>         | <u>AWEI<sub>3</sub></u>   | $(4 * (GREEN - SWIR1) - (0.25 * NIR + 2.75 * SWIR2))$                                                                                                                                                                                                              |
| <u>Automated water extraction index with SWIR1 &amp; SWIR2</u>         | <u>AWEI<sub>4</sub></u>   | $(4 * (GREEN - SWIR2) - (0.25 * NIR + 2.75 * SWIR1))$                                                                                                                                                                                                              |
| <u>Automated water extraction index for urban background</u>           | <u>AWEI<sub>nsh</sub></u> | $GREEN + BLUE + 0.25 * NIR + 1.5 * (NIR + SWIR1) - 0.25 * SWIR2$                                                                                                                                                                                                   |
| <u>Normalized difference index from NIR and GREEN + BLUE</u>           | <u>GBNDVI</u>             | $\frac{(NIR - (GREEN + BLUE))}{(NIR + (GREEN + BLUE))}$                                                                                                                                                                                                            |
| <u>Normalized difference index of three bands</u>                      | <u>GRNDVI</u>             | $\frac{(NIR - (GREEN + RED))}{(NIR + (GREEN + RED))}$                                                                                                                                                                                                              |
| <u>Normalized difference index from NIR and BLUE</u>                   | <u>BNDVI</u>              | $\frac{(NIR - BLUE)}{(NIR + BLUE)}$                                                                                                                                                                                                                                |
| <u>Two Band ratio</u>                                                  | <u>Gossan</u>             | <u>SWIR1/RED</u>                                                                                                                                                                                                                                                   |
| <u>Normalized difference index of four bands</u>                       | <u>GARI</u>               | $\frac{(NIR - (GREEN - (BLUE - RED)))}{(NIR - (GREEN + (BLUE - RED)))}$                                                                                                                                                                                            |
| <u>Norm G</u>                                                          | <u>Norm G</u>             | $G / (NIR + R + G)$                                                                                                                                                                                                                                                |
| <u>Norm NIR</u>                                                        | <u>Norm NIR</u>           | $NIR / (NIR + R + G)$                                                                                                                                                                                                                                              |
| <u>Norm R</u>                                                          | <u>Norm R</u>             | $R / (NIR + R + G)$                                                                                                                                                                                                                                                |
| <u>Normalized difference index from GREEN and BLUE</u>                 | <u>PPR</u>                | $\frac{(GREEN - BLUE)}{(GREEN + BLUE)}$                                                                                                                                                                                                                            |
| <u>Normalized difference index from GREEN and RED</u>                  | <u>PVR</u>                | $\frac{(GREEN - RED)}{(GREEN + RED)}$                                                                                                                                                                                                                              |
| <u>Intensity</u>                                                       | <u>I</u>                  | $(1/30.5)(RED + GREEN + BLUE)$                                                                                                                                                                                                                                     |
| <u>Two Band ratio</u>                                                  | <u>Laterite</u>           | <u>SWIR1/SWIR2</u>                                                                                                                                                                                                                                                 |
| <u>Hue</u>                                                             | <u>H</u>                  | $\arctan((2RED - GREEN - BLUE) / 30.5(GREEN - BLUE))$                                                                                                                                                                                                              |
| <u>Log of two band ratio</u>                                           | <u>LogR</u>               | <u>Log(NIR/RED)</u>                                                                                                                                                                                                                                                |
|                                                                        | <u>mCRIG</u>              | $(BLUE^{-1} - GREEN^{-1}) * NIR$                                                                                                                                                                                                                                   |
| <u>Mid-infrared vegetation index</u>                                   | <u>MVI</u>                | <u>NIR/SWIR1</u>                                                                                                                                                                                                                                                   |
|                                                                        | <u>MSRNir/Red</u>         | $(NIR/RED) - 1 / \sqrt{((NIR/RED) + 1)}$                                                                                                                                                                                                                           |
| <u>Normalized difference index from NIR<sup>2</sup> and RED</u>        | <u>NLI</u>                | $\frac{(NIR^2 - RED)}{(NIR^2 + RED)}$                                                                                                                                                                                                                              |
| <u>Normalized difference index from (SWIR1 and SWIR2)</u>              | <u>NDSI</u>               | $\frac{(SWIR1 - SWIR2)}{(SWIR1 + SWIR2)}$                                                                                                                                                                                                                          |
| <u>Normalized difference index from (NIR and (GREEN + RED + BLUE))</u> | <u>PNDVI</u>              | $\frac{(NIR - (GREEN + RED + BLUE))}{(NIR + (GREEN + RED + BLUE))}$                                                                                                                                                                                                |
| <u>Normalized difference index from (NIR and (RED + BLUE))</u>         | <u>RBNNDVI</u>            | $\frac{(NIR - (RED + BLUE))}{(NIR + (RED + BLUE))}$                                                                                                                                                                                                                |

| Shape index               | IF                  | $(2*RED-GREEN-BLUE)/GREEN-BLUE$ |
|---------------------------|---------------------|---------------------------------|
| Two Band ratio            | $SR550/670$         | $GREEN/RED$                     |
| "                         | $SR860/550$         | $NIR/GREEN$                     |
| "                         | $SRSWIR1/NIR$       | $SWIR1/NIR$                     |
| "                         | $SRSWIR2/NIR$       | $SWIR2/NIR$                     |
| "                         | $DVI$               | $NIR/RED$                       |
| "                         | $RGR$               | $RED/GREEN$                     |
| "                         | $WRI\_1$            | $(GREEN + RED)/(NIR+SWIR1)$     |
| "                         | $WRI\_2$            | $(GREEN + RED)/(NIR+SWIR2)$     |
| Two band averages         |                     | $(RED+NIR)/2$                   |
| "                         |                     | $(GREEN+NIR)/2$                 |
| "                         |                     | $(BLUE+NIR)/2$                  |
| "                         |                     | $(RED+GREEN)/2$                 |
| "                         |                     | $(RED+BLUE)/2$                  |
| "                         |                     | $(GREEN+BLUE)/2$                |
| Three bands average       |                     | $(BLUE+GREEN+RED)/3$            |
| "                         |                     | $(BLUE+GREEN+NIR)/3$            |
| "                         |                     | $(GREEN+RED+NIR)/3$             |
| "                         |                     | $(BLUE+RED+NIR)/3$              |
| Four band averages        |                     | $(BLUE+GREEN+RED+NIR)/4$        |
| Surface Algal Bloom Index | SABI                | $(NIR-RED)/(BLUE+GREEN)$        |
| Three Band Algorithm      | 3BDA-like<br>(KIVU) | $(BLUE-RED)/GREEN$              |

## Supplementary material 2

ML Models hyperparameter tuning result for the three water quality parameters; Chl-a, TDS and Turbidity were shown in Figure S1 - Figure S12, Figure S13 - Figure S24, Figure S25 – Figure S36, respectively.

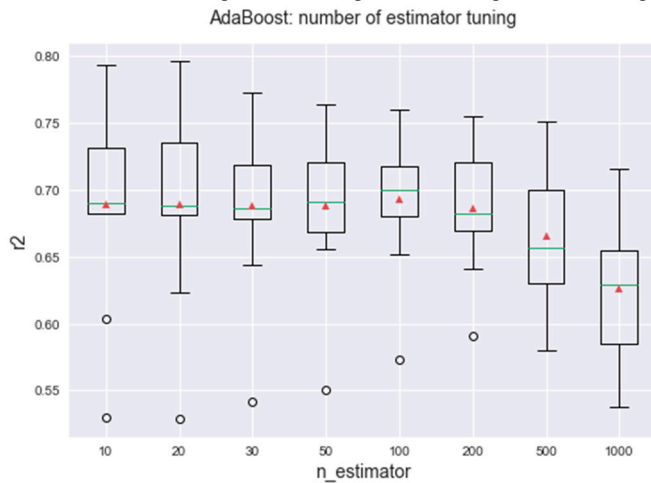

Figure S1: AdaBoost number of estimator tuning for Chl-a

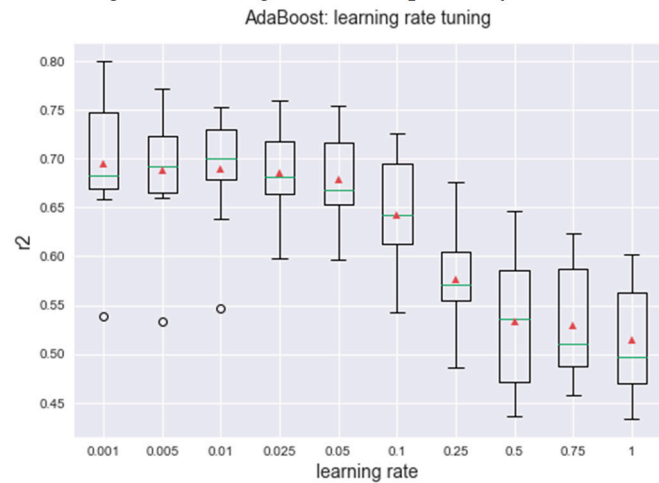

Figure S2: AdaBoost learning rate tuning for Chl-a

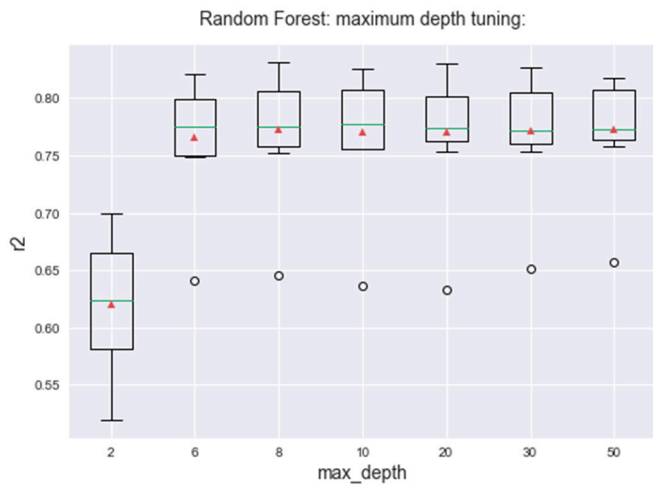

Figure S3: Random Forest maximum depth tuning for Chl-a

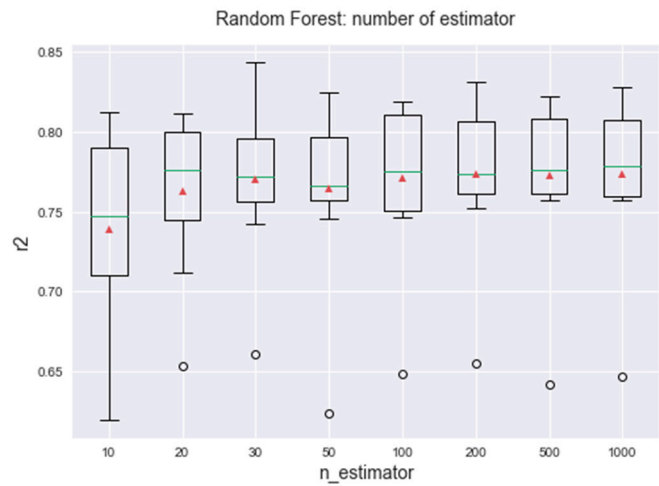

Figure S4: Random Forest number of estimator tuning for Chl-a

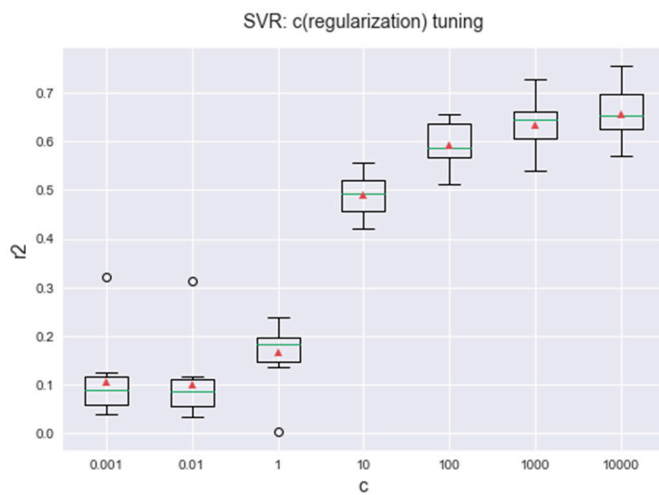

Figure S5: SVR c regularization tuning for Chl-a

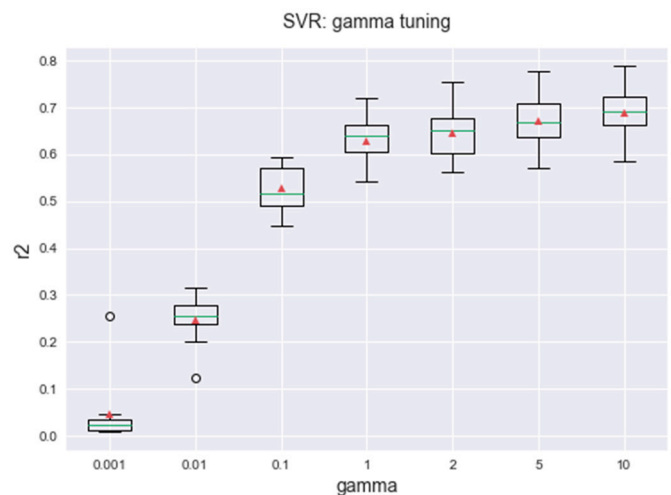

Figure S6: SVR gamma tuning for Chl-a

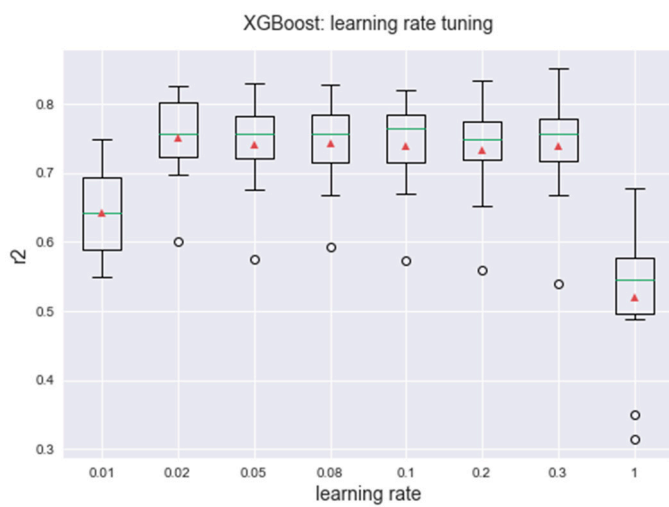

Figure S7: XGBoost learning rate tuning for Chl-a

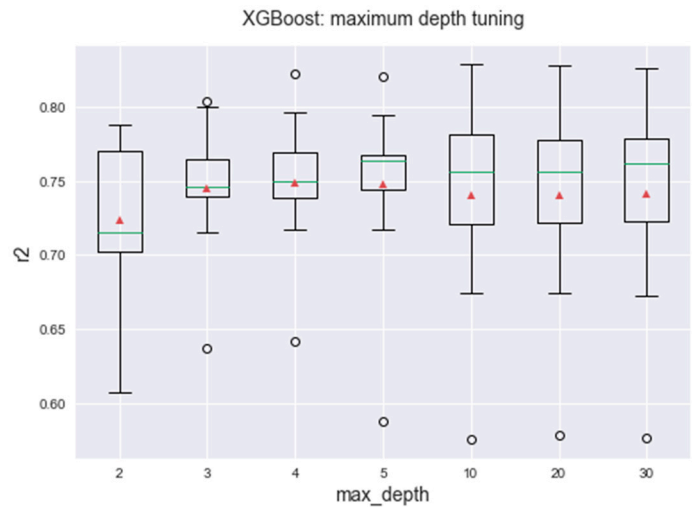

Figure S8: XGBoost maximum depth tuning for Chl-a

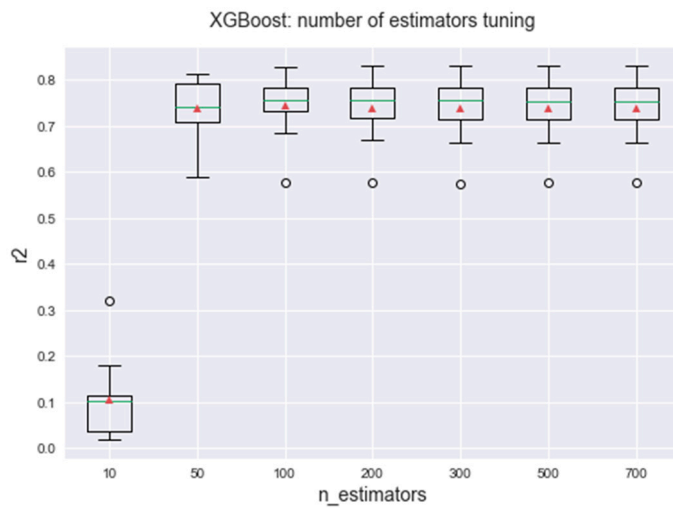

Figure S9: GradBoost number of estimator tuning result for Chl-a

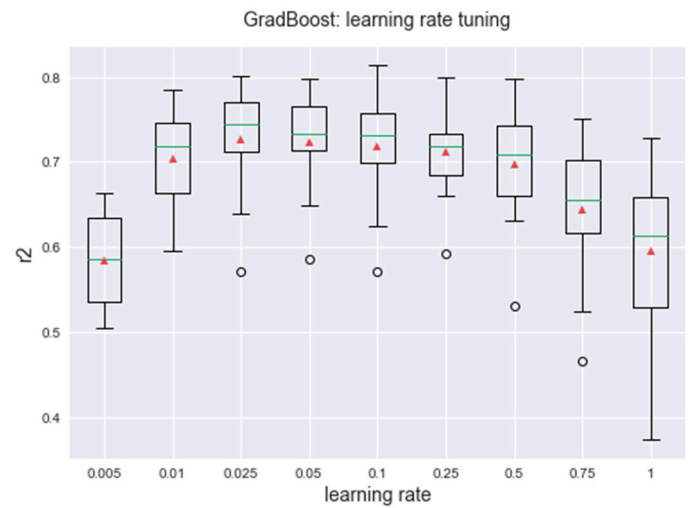

Figure S10: XGBoost learning rate tuning for Chl-a

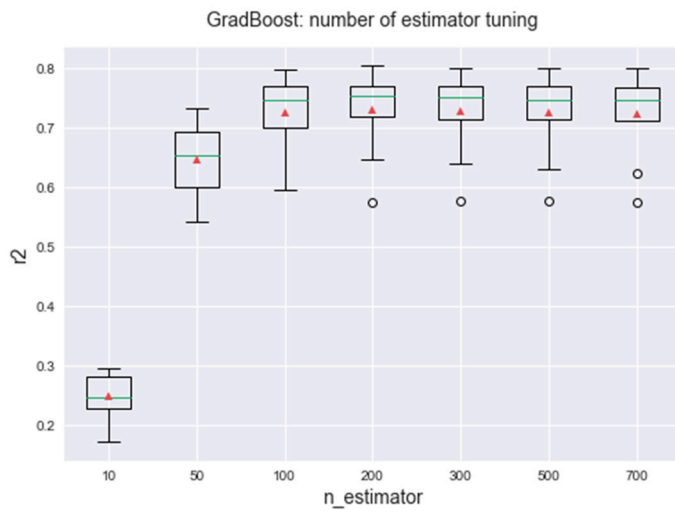

Figure S11: GradBoost number of estimator tuning for Chl-a

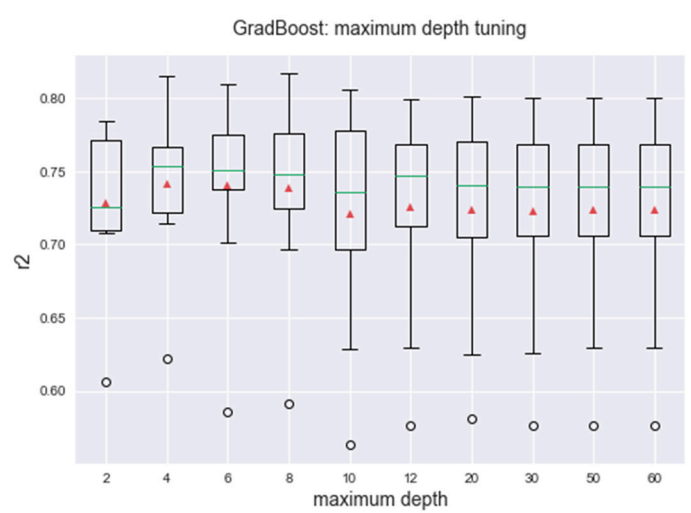

Figure S12: GradBoost maximum depth tuning for Chl-a

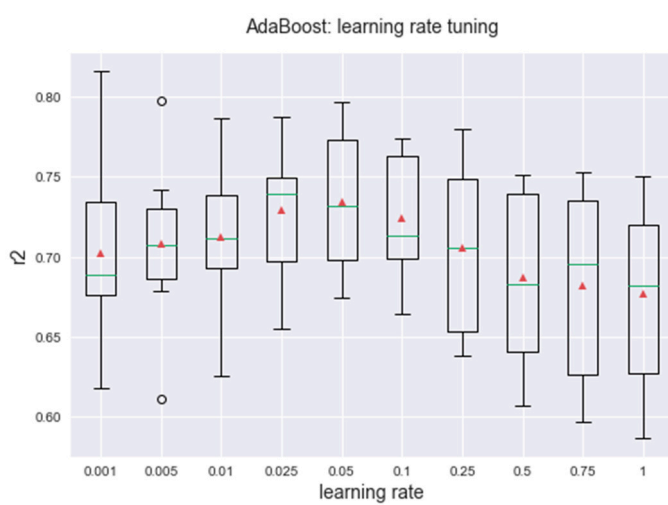

Figure S13: AdaBoost learning rate tuning for TDS

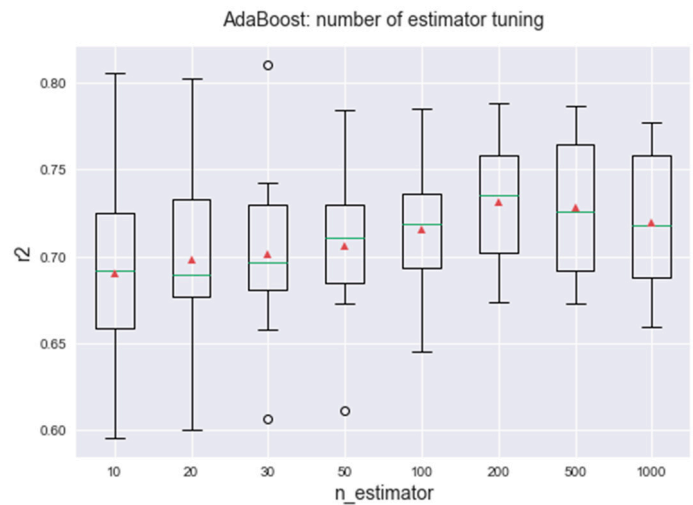

Figure S14: AdaBoost number of estimator tuning for TDS

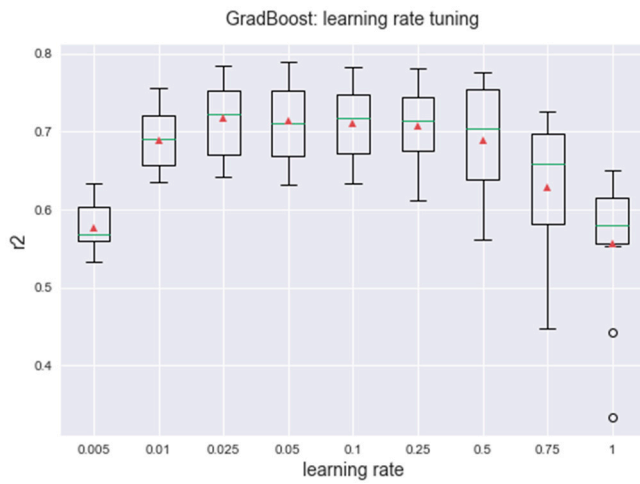

Figure S15: GradBoost learning rate tuning for TDS

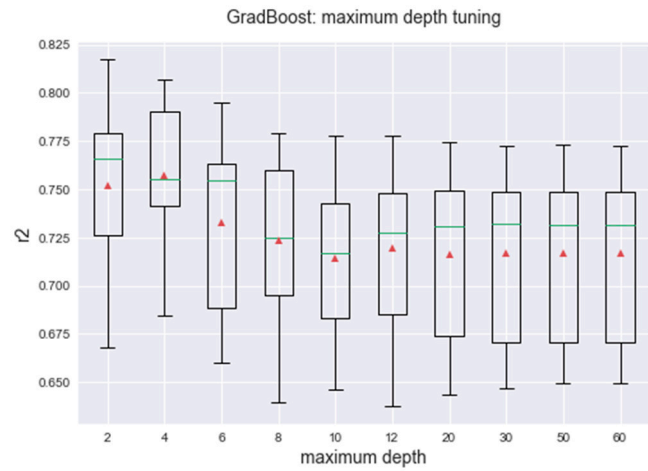

Figure S16: GradBoost maximum depth tuning for TDS

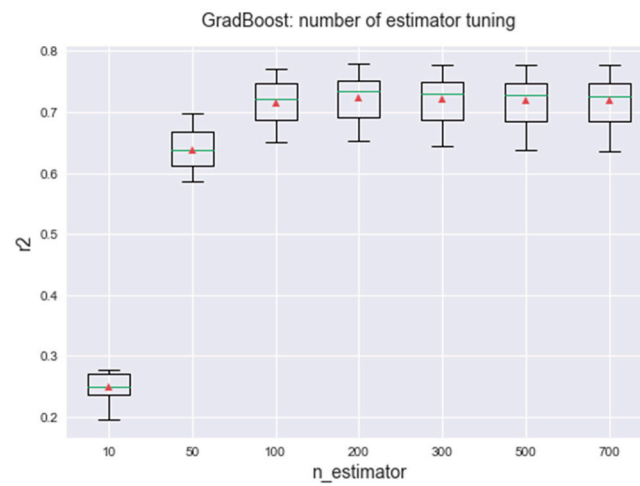

Figure S17: GradBoost number of estimator tuning for TDS

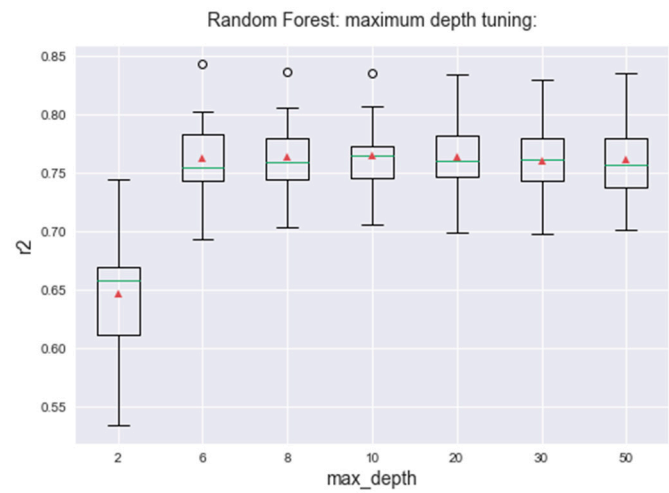

Figure S18: Random Forest maximum depth tuning for TDS

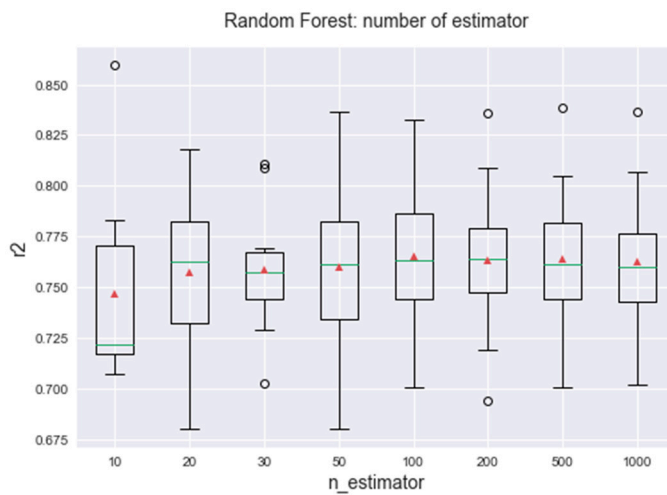

Figure S19: Random Forest number of estimator tuning for TDS

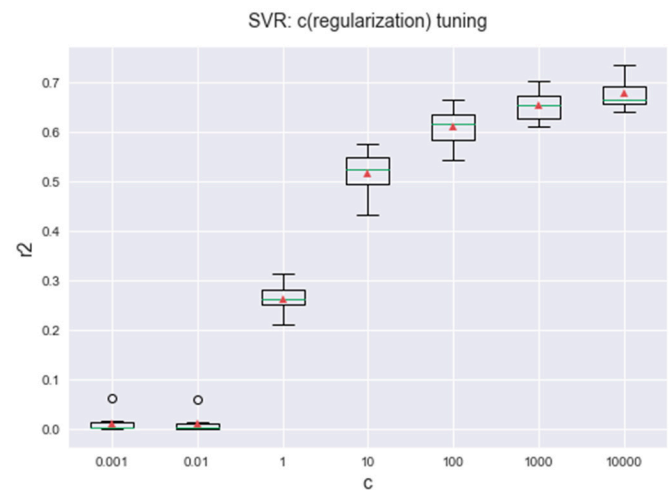

Figure S20: SVR c regularization tuning for TDS

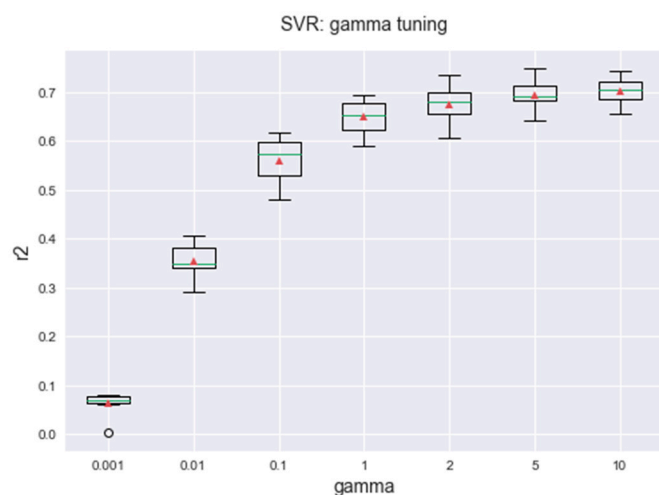

Figure S20: SVR gamma tuning for TDS

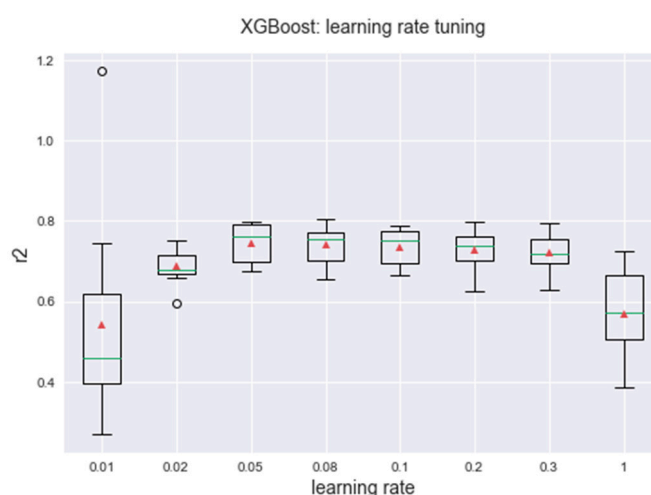

Figure S22: XGBoost learning rate tuning for TDS

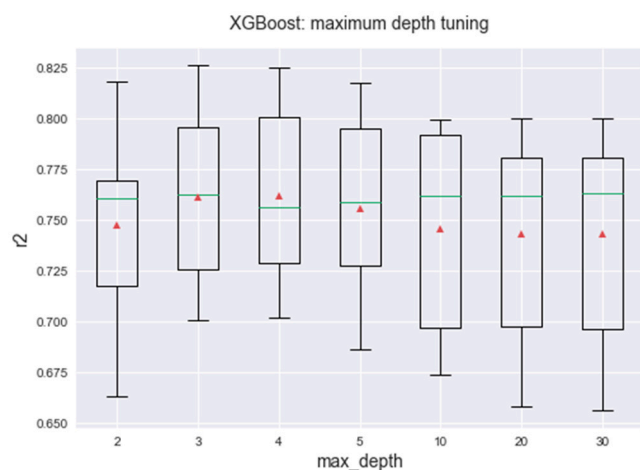

Figure S21: XGBoost maximum depth tuning for TDS

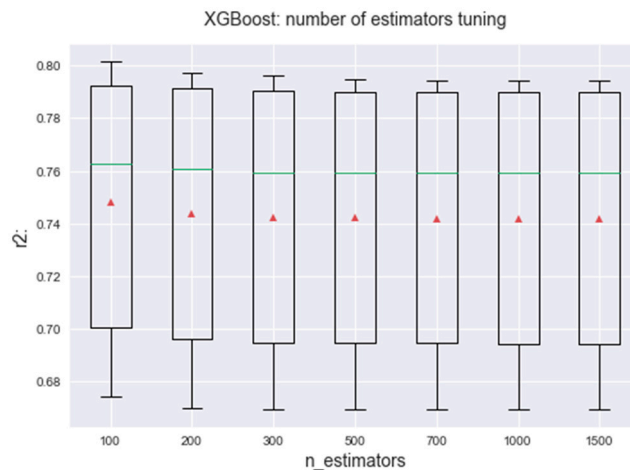

Figure S24: XGBoost number of estimator tuning for TDS

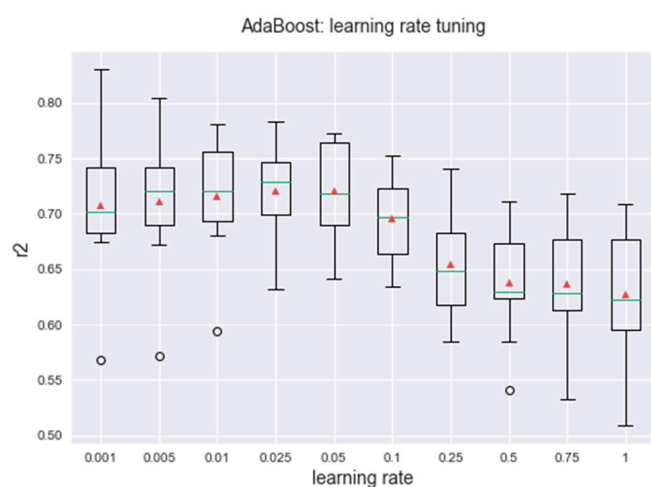

Figure S22: AdaBoost learning rate tuning for TUR

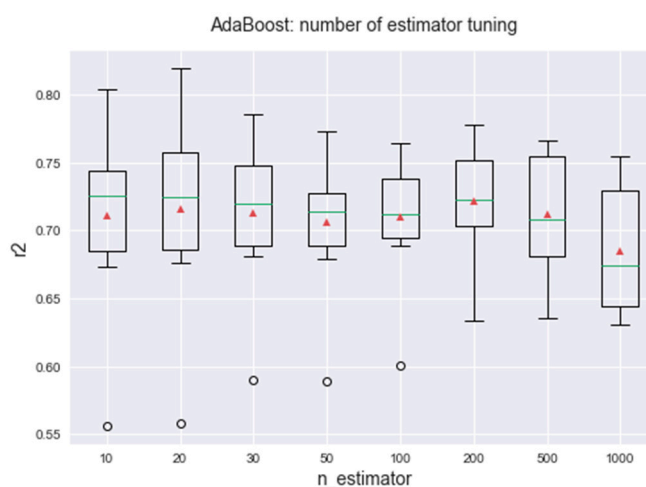

Figure S26: GradBoost number of estimator tuning for TUR

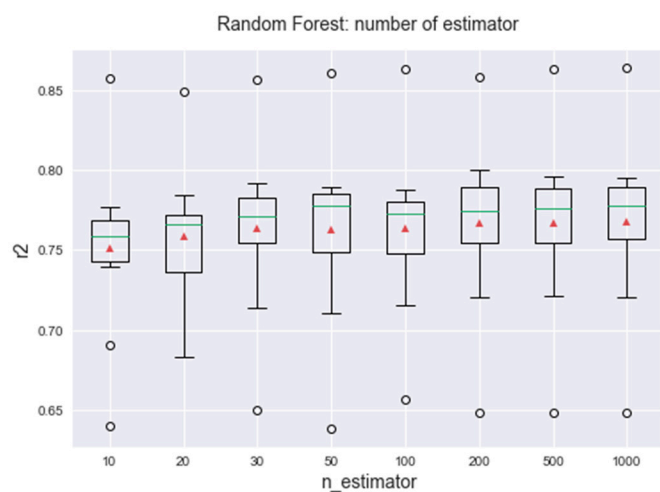

Figure S23: Random Forest number of estimator tuning for TUR

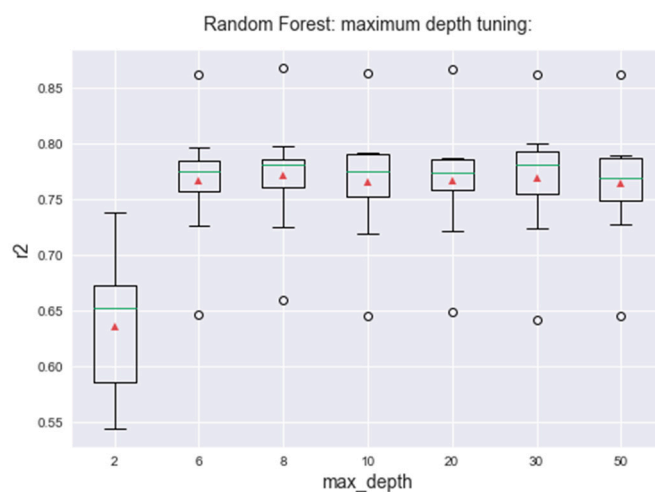

Figure S28: Random Forest maximum depth tuning for TUR

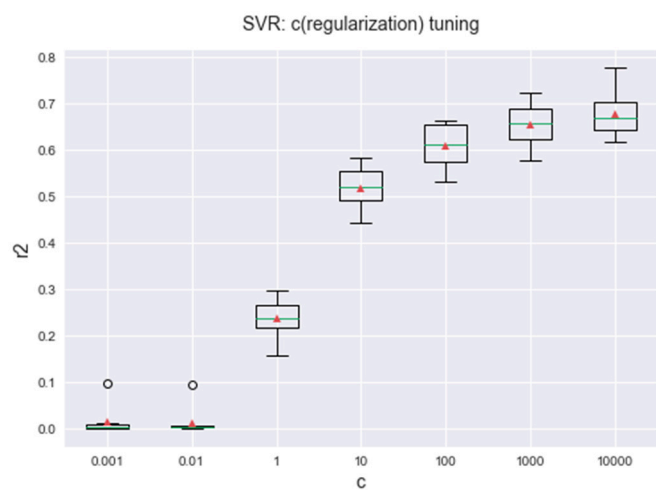

Figure S29: SVR c regularization tuning for TUR

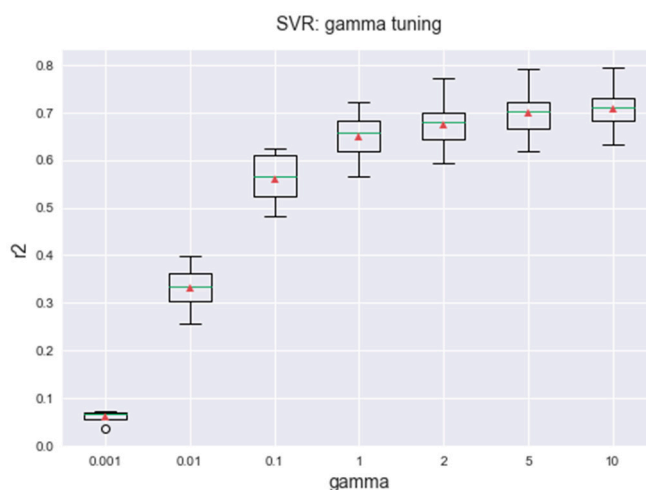

Figure S30: SVRgamma tuning for TUR



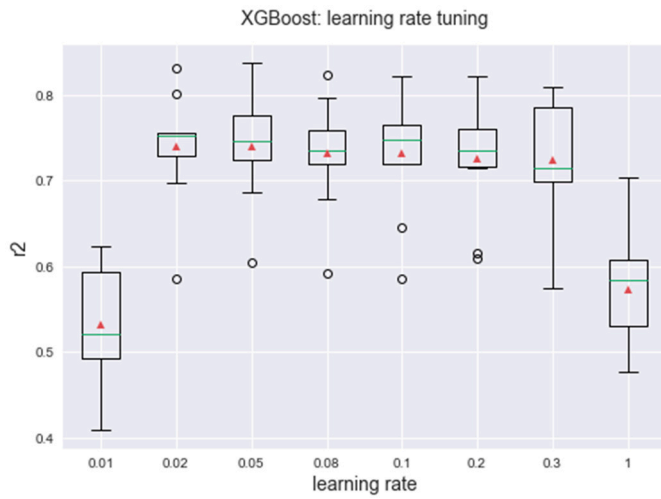

Figure S241: XGBoost learning rate tuning for TUR

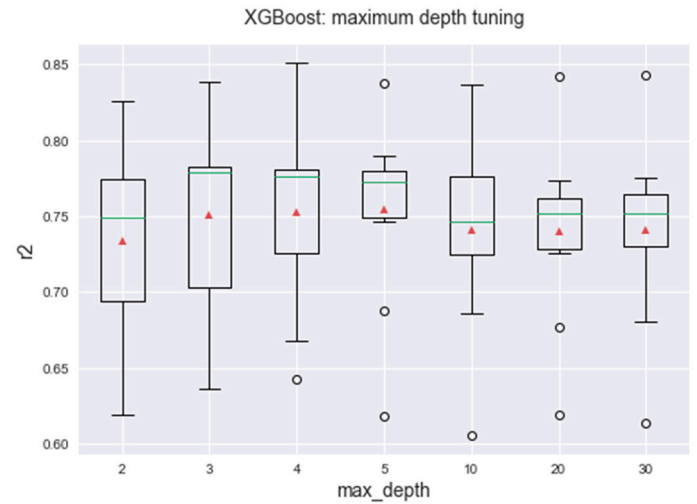

Figure S32: XGBoost maximum depth tuning for TUR

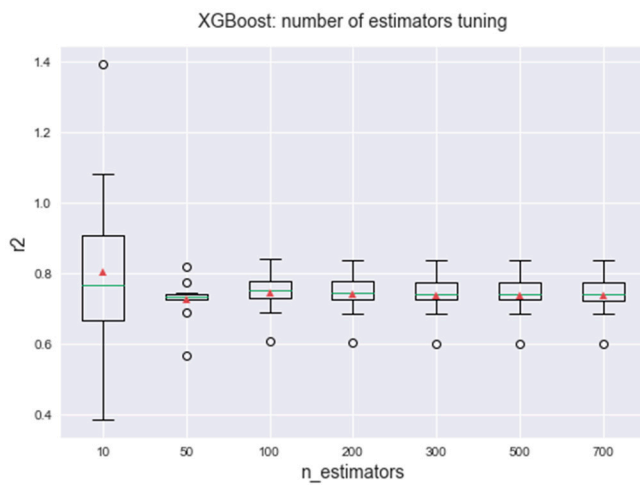

Figure S253: XGBoost number of estimator tuning for TUR

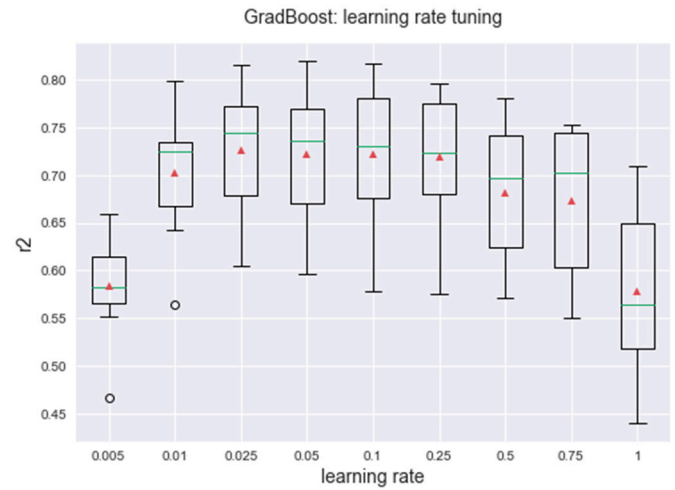

Figure S34: GradBoost learning rate tuning for TUR

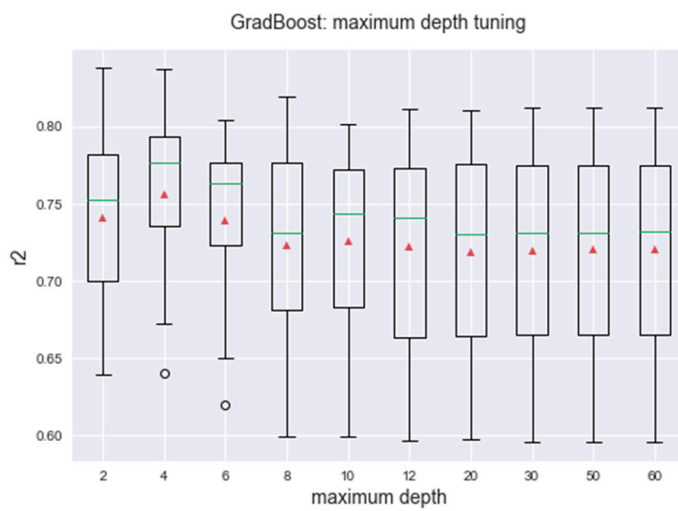

Figure S265: GradBoost maximum depth tuning for TUR

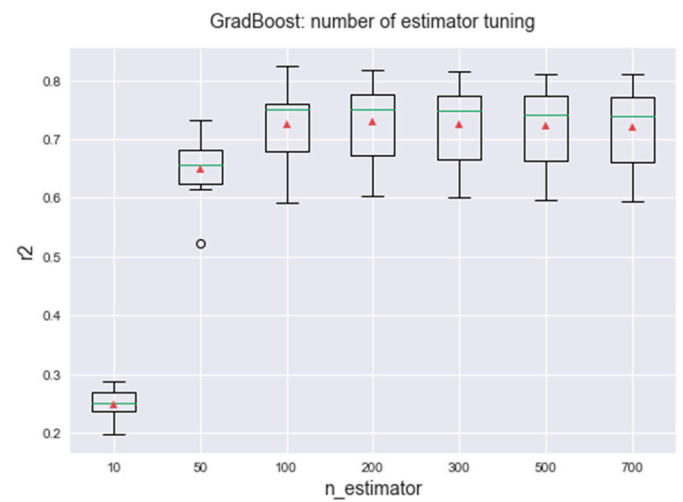

Figure S36: GradBoost number of estimator tuning for TUR
